# Supplementary material for: Single-step and ultrasensitive detection of carcinoembryonic antigen based on an aptamer transduction-mediated exonuclease III-assisted dual-amplification strategy
Source: Royal Society of Chemistry journal article supplement (doi:10.1039/c8ra00416a), 2018-01-01
Supplement: c8ra00416a1.pdf [file c8ra00416a1.pdf]

## Supporting information

### Single-step and ultrasensitive detection of carcinoembryonic antigen based on aptamer-transduction mediated exonuclease III-assisted dual-amplification strategy

Ruojun Lu,<sup>a</sup> Shengqiang Li,<sup>a</sup> Meihong Fan,<sup>a</sup> Jingjing Wei,<sup>a</sup> Xu Liu<sup>a\*</sup>

<sup>a</sup> First Teaching Hospital of Tianjin University of Traditional Chinese Medicine, Tianjin 300020, China

**Table S1.** Sequences from 5' to 3'-terminal of oligonucleotides used in this work

| DNA | Sequence from 5' to 3'-terminal                                  |
|-----|------------------------------------------------------------------|
| H1  | GAATAAGCTGGCATAACCAGCTTATTCAATTCA                                |
| H2  | AAGCTGGTTTATCACTACCTCTCTATTACACAAGCTGGTAGTGATA<br>A ACCAGCTTATTC |
| FS  | FAM-TAGTGATAAAA-BHQ1                                             |

**Table S2.** Comparison of different amplification approaches for CEA detection

| Technique        | Approach <sup>a</sup>                   | Dynamic range<br>(ng mL <sup>-1</sup> ) | LOD<br>(pg mL <sup>-1</sup> ) | Ref.         |
|------------------|-----------------------------------------|-----------------------------------------|-------------------------------|--------------|
| Fluorescence     | Exo III-DNA walker                      | 0.01-100                                | 1.2                           | 1            |
| Electrochemistry | PLA-RCA                                 | 0.001-10                                | 0.49                          | 2            |
| Electrochemistry | PLA -MNAzyme                            | 0.002-500                               | 1.5                           | 3            |
| Electrochemistry | Nanocomposite                           | 0.05-40                                 | 10                            | 4            |
| Electrochemistry | PtPd/N-GQDs@Au                          | 0.000005-50                             | 0.002                         | 5            |
| Fluorescence     | Exo III assisted dual-<br>amplification | 0.0001-10                               | 0.058                         | This<br>work |

<sup>a</sup> PLA, proximity ligation assay; RCA, rolling circle amplification; PtPd/N-GQDs@Au, nitrogen-doped graphene quantum dots supported PtPd bimetallic functionalized Au nanoparticles.

- 1 M. Q. He, K. Wang, W. J. Wang, Y. L. Yu and J. H. Wang, *Anal. Chem.*, 2017, **89**, 9292-9298.
- 2 F. L. Gao, F. Y. Zhou, S. J. Chen, Y. Yao, J. Wu, D. Y. Yin, D. Q. Geng and P. Wang, *Analyst.*, 2017, **142**, 4308-4316.
- 3 K. W. Ren, J. Wu, H. X. Ju and F. Yan, *Anal. Chem.*, 2015, **87**, 1694-1700.
- 4 T. Yang, Y. Gao, Z. Liu, J. Xu, L. Lu and Y. Yu, *Sens. Actuator B-Chem.*, 2017, **239**, 76-84.
- 5 Y. Y. Yang, Q. Liu, Y. Liu, J. J. Cui, H. Liu, P. Wang, Y. Y. Li, L. Chen, Z. D. Zhao and Y. H. Dong, *Biosens. Bioelectron.*, 2017, **90**, 31-38.
